# Supplementary material
Source: PubMed Central journal article supplement (PMC9169159)
Supplement: NIHMS1804548-supplement-1.pdf [file NIHMS1804548-supplement-1.pdf]

1

## 2 **Online Supplement**

3

### 4 **Participant Selection for Original Cohort**

5 Children between 10 and 17 years of age with asthma, receiving daily controller therapy, and fitting the  
6 age- and sex-adjusted body mass index (BMI) parameters for lean (20-65<sup>th</sup> percentile) and  
7 overweight/obese (BMI  $\geq$  85<sup>th</sup> percentile) were enrolled through the Nemours multispecialty pediatric  
8 asthma clinic in Jacksonville, FL. We used common BMI-percentile conventions for overweight/obesity[1,  
9 2], and selected from a narrower BMI-percentile range among normal weight individuals to avoid  
10 misclassification. Asthma was defined by accepted convention: physician-diagnosis of asthma and either  
11 a  $\geq$ 12% improvement in forced expiratory volume in 1 second (FEV1) following bronchodilator or FEV1  
12 methacholine PC20  $\leq$  16 mg/ml[3, 4]. Participants were excluded if they had any smoking history, been  
13 on controller daily oral steroids, had a change in controller therapy in the previous 8 weeks, had any  
14 interval illness in the past 4 weeks, or had another significant chronic disease.

15

### 16 **Clinical Data**

17 Two to three clinic visits within 3 weeks were conducted, with no two visits occurring on successive days.  
18 At visit 1, participants signed an IRB-approved parental permission form and minor assent. Participants  
19 completed staff-directed, structured interviews and questionnaires providing past asthma and medical  
20 history, family and environmental history, quality-of-life information and a comprehensive interview of  
21 asthma symptoms, controller treatment and past healthcare utilization. Each participant's controller step  
22 prescribed by his/her asthma physician was determined[5]. Participants underwent a physical  
23 examination, anthropometric measurements, and spirometry (before and after bronchodilator). Highest  
24 parental education level, median household incomes, and poverty index (percent below poverty level)  
25 was determined for each patient's household. Participants completed a methacholine challenge test and  
26 exhaled nitric oxide (FENO) at visits 2 and 3, respectively, adhering to recommended guidelines[6, 7].

27

28

## 29 **Symptom and Quality-of-Life Analyses**

30 Participants and parents answered structured interview questions regarding symptom patterns, common  
31 asthma triggers and the primary symptom experienced with loss of control. The structured interviews  
32 also documented asthma symptom frequency and severity, digestive symptoms, and sleep  
33 characteristics. Asthma symptom control was assessed at visit 1 using multiple questionnaires (Asthma  
34 Control Questionnaire (ACQ)[8], Asthma Control Test (ACT)[9, 10], and childhood ACT (c-ACT)[11]) to  
35 measure the broad array of symptoms that asthmatic children experience and report. Symptoms were  
36 measured using the Asthma Symptom Utility Index (ASUI)[12].

37 Asthma-related quality-of-life was measured using the Paediatric Asthma Quality of Life  
38 Questionnaire (PAQLQ)[13, 14] and the Paediatric Caregiver's Asthma Quality of Life Questionnaire  
39 (PACQLQ)[15]. Properties of the asthma control scores, symptom scores, and asthma quality of life  
40 scores can be found in the repository.

41

## 42 **Digestive Symptoms assessed from the GSAQ**

43 Digestive symptoms were measured using the Pediatric Gastroesophageal Reflux (GER) Disease  
44 Symptom Assessment Questionnaire (GSAQ) which is a 10-item tool[40] that has been validated in  
45 children in the assessment of gastroesophageal reflux disease and digestive symptoms such as  
46 chest/abdominal pain, pain/choking with eating, swallowing dysfunction, regurgitation and nausea. It  
47 assesses symptom severity from the previous 7-days on an 8-point scale with 0 and 7 indicating the least  
48 and greatest severity, respectively.

49

## 50 **Lung Function Testing**

51 Participants completed spirometry (Jaeger MasterScreen, San Diego, CA) adhering to recommended  
52 ATS standards[16, 17]. Participants also completed fractional exhaled nitric oxide (FENO) (Sievers 280  
53 NOA analyzer, Boulder, CO) maneuvers according to recommended standards[18]. Participants

54 completed a methacholine challenge by experienced staff using the ten Provacholine® concentrations  
55 dosing scheme with a five-breath dosimeter protocol[6].

56

### 57 **Participant Selection for Replicate Cohort**

58 The replicate cohort was taken from a study conducted by the American Lung Association Asthma  
59 Clinical Research Centers (ALA-ACRC). The study design has been published[3]. All participants  
60 signed written informed consents for the Study of Acid-Reflux in Childhood Asthma (SARCA) study,  
61 which was approved by the Nemours Florida IRB (82404-29) and by all other ALA-ACRC IRBs, and  
62 registered at ClinicalTrials.gov (NCT00604851). We included baseline data from 306 participants age  
63 6-17 years with inadequately controlled persistent asthma. For inclusion, participants required  
64 physician diagnosis of asthma, prescription of an asthma controller medication, and either  $\geq 12\%$  post-  
65 bronchodilator FEV1 improvement or methacholine PC20 < 16mg/ml. Inadequate control was defined  
66 by poor ACQ score ( $\geq 1.25$ ), frequent bronchodilator use or exacerbations. Participants required a  
67 recent absence of GERD symptoms that would require treatment with a proton pump inhibitor (PPI) at  
68 the time of enrollment. Medications for treatment of gastrointestinal symptoms in the past month  
69 (including PPI, H2 blockers, bethanechol, and metoclopramide) were exclusionary. Participants with  
70 history of anti-reflux or peptic ulcer surgery were excluded. 2453 participants were screened in order  
71 to randomize 306 participants into the 24-week multicenter clinical trial assessing the efficacy of daily  
72 oral lansoprazole versus placebo for patients with inadequately controlled asthma.

73

### 74 **Data Collected**

75 We collected demographics, body mass index percentiles, spirometry (before and after  
76 bronchodilator), Asthma Control Questionnaire (ACQ) and GERD Symptom Assessment Questionnaire  
77 (GSAQ) at baseline. We grouped participants as underweight, normal weight, overweight or obese by  
78 CDC classification[20] based on age and sex-adjusted BMI-percentile. Since we were primarily  
79 interested in serving as a replicate to the original study, we included only participants with a BMI-  
80 percentile between the 20<sup>th</sup> and 65<sup>th</sup> percentile (leans) and  $\geq 95^{\text{th}}$  percentile (obese). Asthma

81 symptoms were assessed using the ACQ[8] and modified ACQ6[21]. Spirometry with bronchodilator  
82 challenge testing was performed using ATS/ERS standard procedures.

83

84

85

86

87

88

89

90

91

92

93

94

95

96

97

98

99

100

101

102

103

104

105

106

107

109

- 110 [1] Troiano RP, Flegal KM, Kuczmarski RJ, Campbell SM, Johnson CL. Overweight  
111 prevalence and trends for children and adolescents. The National Health and Nutrition  
112 Examination Surveys, 1963 to 1991. Archives of pediatrics & adolescent medicine. 1995  
113 Oct;149(10):1085-91.
- 114 [2] CDC. 2000 CDC Growth Charts for the United States: Methods and  
115 Development: Centers for Disease Control and Prevention (CDC), Vital and Health  
116 Statistics; 2002 May, 2002. Report No.: DHHS Publication No. (PHS) 2002-1696, 01-  
117 0617
- 118 [3] Holbrook JT, Wise RA, Gold BD, Blake K, Brown ED, Castro M, et al.  
119 Lansoprazole for children with poorly controlled asthma: a randomized controlled trial.  
120 Jama. 2012 Jan 25;307(4):373-81.
- 121 [4] Castro M, King TS, Kunselman SJ, Cabana MD, Denlinger L, Holguin F, et al.  
122 Effect of vitamin D3 on asthma treatment failures in adults with symptomatic asthma and  
123 lower vitamin D levels: the VIDA randomized clinical trial. Jama. 2014  
124 May;311(20):2083-91.
- 125 [5] NAEPP. Expert Panel Report 3: Guidelines for the Diagnosis and Management  
126 of Asthma (Full Report 2007): NHLBI/NIH, US Department of Health and Human  
127 Services; 2007 August 28, 2007.
- 128 [6] Crapo RO, Casaburi R, Coates AL, Enright PL, Hankinson JL, Irvin CG, et al.  
129 Guidelines for methacholine and exercise challenge testing-1999. This official statement  
130 of the American Thoracic Society was adopted by the ATS Board of Directors, July  
131 1999. American journal of respiratory and critical care medicine. 2000 Jan;161(1):309-  
132 29.
- 133 [7] Dweik RA, Boggs PB, Erzurum SC, Irvin CG, Leigh MW, Lundberg JO, et al. An  
134 official ATS clinical practice guideline: interpretation of exhaled nitric oxide levels  
135 (FENO) for clinical applications. American journal of respiratory and critical care  
136 medicine. 2011 Sep 1;184(5):602-15.
- 137 [8] Juniper EF, O'Byrne PM, Guyatt GH, Ferrie PJ, King DR. Development and  
138 validation of a questionnaire to measure asthma control. The European respiratory  
139 journal. 1999 Oct;14(4):902-7.
- 140 [9] Schatz M, Sorkness CA, Li JT, Marcus P, Murray JJ, Nathan RA, et al. Asthma  
141 Control Test: reliability, validity, and responsiveness in patients not previously followed  
142 by asthma specialists. The Journal of allergy and clinical immunology. 2006  
143 Mar;117(3):549-56.
- 144 [10] Nathan RA, Sorkness CA, Kosinski M, Schatz M, Li JT, Marcus P, et al.  
145 Development of the asthma control test: a survey for assessing asthma control. The  
146 Journal of allergy and clinical immunology. 2004 Jan;113(1):59-65.
- 147 [11] Schatz M, Kosinski M, Yarlus AS, Hanlon J, Watson ME, Jhingran P. The  
148 minimally important difference of the Asthma Control Test. The Journal of allergy and  
149 clinical immunology. 2009 Oct;124(4):719-23 e1.
- 150 [12] Revicki DA, Leidy NK, Brennan-Diemer F, Sorensen S, Togias A. Integrating  
151 patient preferences into health outcomes assessment: the multiattribute Asthma  
152 Symptom Utility Index. Chest. 1998 Oct;114(4):998-1007.
- 153 [13] Juniper EF, Guyatt GH, Feeny DH, Ferrie PJ, Griffith LE, Townsend M.  
154 Measuring quality of life in children with asthma. Qual Life Res. 1996 Feb;5(1):35-46.
- 155 [14] Juniper EF, Guyatt GH, Willan A, Griffith LE. Determining a minimal important  
156 change in a disease-specific Quality of Life Questionnaire. Journal of clinical  
157 epidemiology. 1994 Jan;47(1):81-7.
- 158 [15] Juniper EF, Guyatt GH, Feeny DH, Ferrie PJ, Griffith LE, Townsend M.  
159 Measuring quality of life in the parents of children with asthma. Qual Life Res. 1996  
160 Feb;5(1):27-34.

- 161 [16] Miller MR, Hankinson J, Brusasco V, Burgos F, Casaburi R, Coates A, et al.  
162 Standardisation of spirometry. *The European respiratory journal*. 2005 Aug;26(2):319-  
163 38.
- 164 [17] Wanger J, Clausen JL, Coates A, Pedersen OF, Brusasco V, Burgos F, et al.  
165 Standardisation of the measurement of lung volumes. *The European respiratory journal*.  
166 2005 Sep;26(3):511-22.
- 167 [18] ATS/ERS recommendations for standardized procedures for the online and  
168 offline measurement of exhaled lower respiratory nitric oxide and nasal nitric oxide,  
169 2005. *American journal of respiratory and critical care medicine*. 2005 Apr  
170 15;171(8):912-30.
- 171 [19] Borrell LN, Nguyen EA, Roth LA, Oh SS, Tcheurekdjian H, Sen S, et al.  
172 Childhood obesity and asthma control in the GALA II and SAGE II studies. *American*  
173 *journal of respiratory and critical care medicine*. 2011 Apr 1;187(7):697-702.
- 174 [20] Barlow SE. Expert committee recommendations regarding the prevention,  
175 assessment, and treatment of child and adolescent overweight and obesity: summary  
176 report. *Pediatrics*. 2007 Dec;120 Suppl 4:S164-92.
- 177 [21] Lang JE, Hossain J, Dixon AE, Shade D, Wise RA, Peters SP, et al. Does age  
178 impact the obese asthma phenotype? Longitudinal asthma control, airway function, and  
179 airflow perception among mild persistent asthmatics. *Chest*. 2011 Dec;140(6):1524-33.  
180  
181

## Supplement Figures

Figure E1 Impulse oscillometry among lean, overweight and obese adolescents measured by respiratory system resistance (A) and reactance (B). Error bars denote standard deviations. No differences were seen based on body habitus at any hertz.

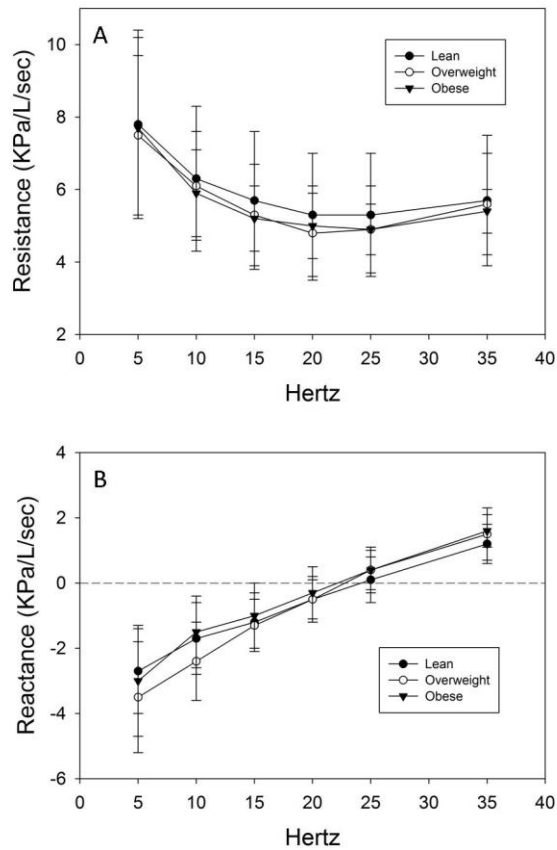

| Table E1: Patient Characteristics by GSAQ Score Tertiles                                                                                                                                                                                                                                                                                                                                                                                                                                            |               |             |             |         |
|-----------------------------------------------------------------------------------------------------------------------------------------------------------------------------------------------------------------------------------------------------------------------------------------------------------------------------------------------------------------------------------------------------------------------------------------------------------------------------------------------------|---------------|-------------|-------------|---------|
| Variables, mean (SD)                                                                                                                                                                                                                                                                                                                                                                                                                                                                                | GSAQ Tertiles |             |             | p-value |
|                                                                                                                                                                                                                                                                                                                                                                                                                                                                                                     | T1            | T2          | T3          |         |
| n                                                                                                                                                                                                                                                                                                                                                                                                                                                                                                   | 124           | 74          | 108         |         |
| GER Score range                                                                                                                                                                                                                                                                                                                                                                                                                                                                                     | 0-4           | 6-15        | 16-223      |         |
| Female, n (%)                                                                                                                                                                                                                                                                                                                                                                                                                                                                                       | 42 (34)       | 27 (36)     | 49 (45)     | .184    |
| Race, n (%)                                                                                                                                                                                                                                                                                                                                                                                                                                                                                         |               |             |             | .191    |
| White                                                                                                                                                                                                                                                                                                                                                                                                                                                                                               | 45 (36)       | 26 (35)     | 47 (44)     |         |
| Black                                                                                                                                                                                                                                                                                                                                                                                                                                                                                               | 64 (52)       | 38 (51)     | 51 (47)     |         |
| Other                                                                                                                                                                                                                                                                                                                                                                                                                                                                                               | 15 (12)       | 10 (14)     | 10 (9)      |         |
| Hispanic/Latino, n (%)                                                                                                                                                                                                                                                                                                                                                                                                                                                                              | 25 (20)       | 11 (15)     | 17 (16)     | .571    |
| Birth weight < 2.5 kg, n (%)                                                                                                                                                                                                                                                                                                                                                                                                                                                                        | 12 (10)       | 3 (4)       | 3 (3)       | .078    |
| Age of asthma diagnosis, years                                                                                                                                                                                                                                                                                                                                                                                                                                                                      | 3.1 (2.8)     | 3.5 (3.2)   | 3.6 (3.5)   | .194C   |
| BMI ≥95 <sup>th</sup> percentile, n (%) <sup>C</sup>                                                                                                                                                                                                                                                                                                                                                                                                                                                | 38 (31)       | 21 (28)     | 35 (32)     | .846    |
| Anthropometric measures <sup>T</sup>                                                                                                                                                                                                                                                                                                                                                                                                                                                                |               |             |             | .225    |
| BMI-percentile                                                                                                                                                                                                                                                                                                                                                                                                                                                                                      | 75.5 (25.8)   | 68.4 (30.1) | 72.9 (29.0) |         |
| Environment                                                                                                                                                                                                                                                                                                                                                                                                                                                                                         |               |             |             | .928    |
| ETS exposure at home, n (%)                                                                                                                                                                                                                                                                                                                                                                                                                                                                         | 21 (17)       | 14 (19)     | 19 (18)     |         |
| Co-morbidities                                                                                                                                                                                                                                                                                                                                                                                                                                                                                      |               |             |             |         |
| GER disease                                                                                                                                                                                                                                                                                                                                                                                                                                                                                         | 0 (0)         | 0 (0)       | 0 (0)       | --      |
| Allergic rhinitis                                                                                                                                                                                                                                                                                                                                                                                                                                                                                   | 68 (55)       | 51 (69)     | 62 (57)     | .130    |
| Neuropsychiatric disorder                                                                                                                                                                                                                                                                                                                                                                                                                                                                           | 0 (0)         | 0 (0)       | 0 (0)       | --      |
| Controller treatments, n (%)                                                                                                                                                                                                                                                                                                                                                                                                                                                                        |               |             |             |         |
| ICS-LABA                                                                                                                                                                                                                                                                                                                                                                                                                                                                                            | 75 (60)       | 48 (65)     | 51 (47)     | .035    |
| LTRA                                                                                                                                                                                                                                                                                                                                                                                                                                                                                                | 69 (56)       | 32 (43)     | 60 (56)     | .514    |
| Utilization for Asthma                                                                                                                                                                                                                                                                                                                                                                                                                                                                              |               |             |             |         |
| Urgent care visits in past year                                                                                                                                                                                                                                                                                                                                                                                                                                                                     | 2.3 (2.6)     | 3.0 (3.4)   | 3.4 (5.4)   | .042T   |
| Steroid bursts in past year                                                                                                                                                                                                                                                                                                                                                                                                                                                                         | 1.6 (1.6)     | 2.0 (2.3)   | 1.8 (2.1)   | .377    |
| Values are means (SD) unless noted, SD – standard deviation, GSAQ – GERD symptom assessment questionnaire, GERD – gastroesophageal reflux disease, BMI – body mass index, ETS – environmental tobacco smoke, IQR – intraquartile range, ICS – inhaled corticosteroids, LABA – long acting Beta-agonists, LTRA – leukotriene receptor antagonist, T - ANOVA test for linear trend used for continuous variables, C - Cochran-Armitage Trend test for categorical variables, K – Kruskal-Wallis test. |               |             |             |         |



| Table E2a: Correlation Coefficients between Asthma and GSAQ score subscales in Obese Children (BMI $\geq$ 95 <sup>th</sup> percentile) |                                      |                                                                                                                                                                                                                                                                                                                                                                                                                                                                                                                                                                                                                                                                                                                                                                                                                                                                                                                                                                                                                                                                                                                                                                                                                                                                                                                                                                                                                                       |                               |                                      |                                      |                   |                  |                    |                |                |
|----------------------------------------------------------------------------------------------------------------------------------------|--------------------------------------|---------------------------------------------------------------------------------------------------------------------------------------------------------------------------------------------------------------------------------------------------------------------------------------------------------------------------------------------------------------------------------------------------------------------------------------------------------------------------------------------------------------------------------------------------------------------------------------------------------------------------------------------------------------------------------------------------------------------------------------------------------------------------------------------------------------------------------------------------------------------------------------------------------------------------------------------------------------------------------------------------------------------------------------------------------------------------------------------------------------------------------------------------------------------------------------------------------------------------------------------------------------------------------------------------------------------------------------------------------------------------------------------------------------------------------------|-------------------------------|--------------------------------------|--------------------------------------|-------------------|------------------|--------------------|----------------|----------------|
|                                                                                                                                        | ACQ                                  | Woken                                                                                                                                                                                                                                                                                                                                                                                                                                                                                                                                                                                                                                                                                                                                                                                                                                                                                                                                                                                                                                                                                                                                                                                                                                                                                                                                                                                                                                 | morning                       | activities                           | SOB                                  | Wheeze            | SABA             | FEV1               | FEV1%          | FEV1/FVC       |
| GER score                                                                                                                              | <b>.474</b><br>( <b>&lt;.0001</b> )  | 0.325<br>(0.0013)                                                                                                                                                                                                                                                                                                                                                                                                                                                                                                                                                                                                                                                                                                                                                                                                                                                                                                                                                                                                                                                                                                                                                                                                                                                                                                                                                                                                                     | 0.392<br>( <b>&lt;.0001</b> ) | <b>0.437</b><br>( <b>&lt;.0001</b> ) | <b>0.460</b><br>( <b>&lt;.0001</b> ) | 0.385<br>(0.0001) | .344<br>(0.0006) | -0.001<br>(0.9925) | .017<br>(.864) | .028<br>(.784) |
| Abdominal pain                                                                                                                         | 0.355<br>(0.0004)                    | Measures are Pearson's correlation coefficients (p-values), GSAQ – GERD symptoms assessment questionnaire, GERD – gastroesophageal reflux disease, ACQ – asthma control questionnaire score, FEV1% – Forced expiratory volume in 1 second (percent predicted), SOB – shortness of breath, SABA – short acting beta-agonist use, FEV1% – forced expiratory volume in 1 second percent predicted, FVC – forced vital capacity (liters), <b>Dark grey</b> boxes indicate p-value significance <0.01, Light grey boxes indicate p-value significance < 0.05. <b>BOLDED</b> values represent R values $\geq$ 0.400. Woken – “on average, during the past week, how often were you woken by your asthma during the night?” Morning – “on average, during the past week, how bad were your asthma symptoms when you woke up in the morning?” Activities – “In general, during the past week, how limited were you in your activities because of your asthma?” SOB – “In general, during the past week, how much shortness of breath did you experience because of your asthma?” Wheeze – “In general, during the past week, how much time did you wheeze?” SABA – “On average, during the past week, how many puffs/inhalations of short-acting bronchodilator have you used each day? FEV1 – FEV1 percent predicted subscale of ACQ represented by a 7-point ordinal scale, FEV1% - FEV1 percent predicted, FVC – forced expiratory volume. |                               |                                      |                                      |                   |                  |                    |                |                |
| Chest pain / heartburn                                                                                                                 | 0.259<br>(0.0112)                    |                                                                                                                                                                                                                                                                                                                                                                                                                                                                                                                                                                                                                                                                                                                                                                                                                                                                                                                                                                                                                                                                                                                                                                                                                                                                                                                                                                                                                                       |                               |                                      |                                      |                   |                  |                    |                |                |
| Difficulty swallowing                                                                                                                  | 0.288<br>(0.0046)                    |                                                                                                                                                                                                                                                                                                                                                                                                                                                                                                                                                                                                                                                                                                                                                                                                                                                                                                                                                                                                                                                                                                                                                                                                                                                                                                                                                                                                                                       |                               |                                      |                                      |                   |                  |                    |                |                |
| Night-time pain / awakening                                                                                                            | 0.307<br>(0.0025)                    |                                                                                                                                                                                                                                                                                                                                                                                                                                                                                                                                                                                                                                                                                                                                                                                                                                                                                                                                                                                                                                                                                                                                                                                                                                                                                                                                                                                                                                       |                               |                                      |                                      |                   |                  |                    |                |                |
| Nausea                                                                                                                                 | <b>0.439</b><br>( <b>&lt;.0001</b> ) |                                                                                                                                                                                                                                                                                                                                                                                                                                                                                                                                                                                                                                                                                                                                                                                                                                                                                                                                                                                                                                                                                                                                                                                                                                                                                                                                                                                                                                       |                               |                                      |                                      |                   |                  |                    |                |                |
| Vomiting / Regurgitation                                                                                                               | 0.150<br>(0.1467)                    |                                                                                                                                                                                                                                                                                                                                                                                                                                                                                                                                                                                                                                                                                                                                                                                                                                                                                                                                                                                                                                                                                                                                                                                                                                                                                                                                                                                                                                       |                               |                                      |                                      |                   |                  |                    |                |                |
| Burping / belching                                                                                                                     | .373<br>(.0002)                      |                                                                                                                                                                                                                                                                                                                                                                                                                                                                                                                                                                                                                                                                                                                                                                                                                                                                                                                                                                                                                                                                                                                                                                                                                                                                                                                                                                                                                                       |                               |                                      |                                      |                   |                  |                    |                |                |
| Choking when eating                                                                                                                    | .384<br>( <b>&lt;.0001</b> )         |                                                                                                                                                                                                                                                                                                                                                                                                                                                                                                                                                                                                                                                                                                                                                                                                                                                                                                                                                                                                                                                                                                                                                                                                                                                                                                                                                                                                                                       |                               |                                      |                                      |                   |                  |                    |                |                |
| Pain after eating                                                                                                                      | .238<br>(0.0201)                     |                                                                                                                                                                                                                                                                                                                                                                                                                                                                                                                                                                                                                                                                                                                                                                                                                                                                                                                                                                                                                                                                                                                                                                                                                                                                                                                                                                                                                                       |                               |                                      |                                      |                   |                  |                    |                |                |

| Table E2b: Correlation Coefficients between Asthma and GSAQ score subscales in Lean Children (BMI 20-65 <sup>th</sup> percentile) |                   |                                                                                                                                                                                                                                                                                                                                                                                                                                                                                                                                                                                                                                                                                                                                                                                                                                                                                                                                                                                                                                                                                                                                                                                                                                                                                                                                                                                                                                  |                                        |                     |                     |                     |                     |                      |                    |                    |
|-----------------------------------------------------------------------------------------------------------------------------------|-------------------|----------------------------------------------------------------------------------------------------------------------------------------------------------------------------------------------------------------------------------------------------------------------------------------------------------------------------------------------------------------------------------------------------------------------------------------------------------------------------------------------------------------------------------------------------------------------------------------------------------------------------------------------------------------------------------------------------------------------------------------------------------------------------------------------------------------------------------------------------------------------------------------------------------------------------------------------------------------------------------------------------------------------------------------------------------------------------------------------------------------------------------------------------------------------------------------------------------------------------------------------------------------------------------------------------------------------------------------------------------------------------------------------------------------------------------|----------------------------------------|---------------------|---------------------|---------------------|---------------------|----------------------|--------------------|--------------------|
|                                                                                                                                   | ACQ               | Woken                                                                                                                                                                                                                                                                                                                                                                                                                                                                                                                                                                                                                                                                                                                                                                                                                                                                                                                                                                                                                                                                                                                                                                                                                                                                                                                                                                                                                            | Morning                                | Activities          | SOB                 | Wheeze              | SABA                | FEV1                 | FEV1%              | FEV1/FVC           |
| GER score                                                                                                                         | 0.354<br>(0.0011) | 0.28866<br>(0.0085)                                                                                                                                                                                                                                                                                                                                                                                                                                                                                                                                                                                                                                                                                                                                                                                                                                                                                                                                                                                                                                                                                                                                                                                                                                                                                                                                                                                                              | <b>0.44623</b><br>( <b>&lt;.0001</b> ) | 0.24140<br>(0.0289) | 0.36542<br>(0.0007) | 0.22239<br>(0.0446) | 0.12055<br>(0.2807) | -0.04071<br>(0.7165) | 0.0508<br>(0.6143) | 0.1660<br>(0.0970) |
| Abdominal pain                                                                                                                    | 0.135<br>(0.2263) | Measures are Pearson's correlation coefficients (p-values), GSAQ – GERD symptoms assessment questionnaire, GERD – gastroesophageal reflux disease, ACQ – asthma control questionnaire score, FEV1% – Forced expiratory volume in 1 second (percent predicted), SOB – shortness of breath, SABA – short acting beta-agonist use, FEV1% – forced expiratory volume in 1 second percent predicted, FVC – forced vital capacity (liters), <b>Dark grey</b> boxes indicate p-value significance <0.01, Light grey boxes indicate p-value significance < 0.05. <b>BOLDED</b> values represent R values ≥ 0.400. Woken – “on average, during the past week, how often were you woken by your asthma during the night?” Morning – “on average, during the past week, how bad were your asthma symptoms when you woke up in the morning?” Activities – “In general, during the past week, how limited were you in your activities because of your asthma?” SOB – “In general, during the past week, how much shortness of breath did you experience because of your asthma?” Wheeze – “In general, during the past week, how much time did you wheeze?” SABA – “On average, during the past week, how many puffs/inhalations of short-acting bronchodilator have you used each day? FEV1 – FEV1 percent predicted subscale of ACQ represented by a 7-point ordinal scale, FEV1% - FEV1 percent predicted, FVC – forced expiratory volume. |                                        |                     |                     |                     |                     |                      |                    |                    |
| Chest pain / heartburn                                                                                                            | 0.254<br>(0.0211) |                                                                                                                                                                                                                                                                                                                                                                                                                                                                                                                                                                                                                                                                                                                                                                                                                                                                                                                                                                                                                                                                                                                                                                                                                                                                                                                                                                                                                                  |                                        |                     |                     |                     |                     |                      |                    |                    |
| Difficulty swallowing                                                                                                             | 0.179<br>(0.1076) |                                                                                                                                                                                                                                                                                                                                                                                                                                                                                                                                                                                                                                                                                                                                                                                                                                                                                                                                                                                                                                                                                                                                                                                                                                                                                                                                                                                                                                  |                                        |                     |                     |                     |                     |                      |                    |                    |
| Nausea                                                                                                                            | 0.217<br>(0.0506) |                                                                                                                                                                                                                                                                                                                                                                                                                                                                                                                                                                                                                                                                                                                                                                                                                                                                                                                                                                                                                                                                                                                                                                                                                                                                                                                                                                                                                                  |                                        |                     |                     |                     |                     |                      |                    |                    |
| Vomiting / Regurgitation                                                                                                          | 0.082<br>(0.4624) |                                                                                                                                                                                                                                                                                                                                                                                                                                                                                                                                                                                                                                                                                                                                                                                                                                                                                                                                                                                                                                                                                                                                                                                                                                                                                                                                                                                                                                  |                                        |                     |                     |                     |                     |                      |                    |                    |
| Burping / belching                                                                                                                | 0.072<br>(0.5224) |                                                                                                                                                                                                                                                                                                                                                                                                                                                                                                                                                                                                                                                                                                                                                                                                                                                                                                                                                                                                                                                                                                                                                                                                                                                                                                                                                                                                                                  |                                        |                     |                     |                     |                     |                      |                    |                    |
| Choking when eating                                                                                                               | 0.127<br>(0.2538) |                                                                                                                                                                                                                                                                                                                                                                                                                                                                                                                                                                                                                                                                                                                                                                                                                                                                                                                                                                                                                                                                                                                                                                                                                                                                                                                                                                                                                                  |                                        |                     |                     |                     |                     |                      |                    |                    |
| Pain after eating                                                                                                                 | 0.189<br>(0.0884) |                                                                                                                                                                                                                                                                                                                                                                                                                                                                                                                                                                                                                                                                                                                                                                                                                                                                                                                                                                                                                                                                                                                                                                                                                                                                                                                                                                                                                                  |                                        |                     |                     |                     |                     |                      |                    |                    |

| Table E3: Impulse Oscillometry Measures by BMI-percentile grouping                                                                          |                       |             |             | 103                  |
|---------------------------------------------------------------------------------------------------------------------------------------------|-----------------------|-------------|-------------|----------------------|
| Variables, mean (SD)                                                                                                                        | BMI-percentile groups |             |             | p-value <sup>T</sup> |
|                                                                                                                                             | 20-65%                | 85-94%      | 95-100%     |                      |
| n                                                                                                                                           | 21                    | 12          | 23          | 106                  |
| Impedance (KPa/L/sec), mean (SD)                                                                                                            |                       |             |             |                      |
| Z5                                                                                                                                          | 8.3 (2.8)             | 8.6 (2.5)   | 7.7 (2.1)   | .478                 |
| Resistance (KPa/L/sec), mean (SD)                                                                                                           |                       |             |             |                      |
| R5                                                                                                                                          | 7.8 (2.6)             | 7.5 (2.2)   | 7.7 (2.5)   | .851                 |
| R10                                                                                                                                         | 6.3 (2.0)             | 6.1 (1.5)   | 5.9 (1.2)   | .433                 |
| R15                                                                                                                                         | 5.7 (1.9)             | 5.3 (1.4)   | 5.2 (0.9)   | .314                 |
| R20                                                                                                                                         | 5.3 (1.7)             | 4.8 (1.3)   | 5.0 (0.9)   | .382                 |
| R25                                                                                                                                         | 5.3 (1.7)             | 4.9 (1.2)   | 4.9 (0.7)   | .339                 |
| R35                                                                                                                                         | 5.7 (1.8)             | 5.6 (1.4)   | 5.4 (0.6)   | .534                 |
| Reactance (KPa/L/sec) <sup>1</sup> , mean (SD)                                                                                              |                       |             |             |                      |
| X5                                                                                                                                          | -2.7 (1.3)            | -3.5 (1.7)  | -3.0 (1.7)  | .527                 |
| X10                                                                                                                                         | -1.7 (1.1)            | -2.4 (1.2)  | -1.5 (1.1)  | .715                 |
| X15                                                                                                                                         | -1.2 (0.9)            | -1.3 (0.8)  | -1.0 (1.0)  | .612                 |
| X20                                                                                                                                         | -0.5 (0.7)            | -0.5 (0.6)  | -0.3 (0.8)  | .309                 |
| X25                                                                                                                                         | 0.1 (0.7)             | 0.4 (0.7)   | 0.4 (0.6)   | .178                 |
| X35                                                                                                                                         | 1.2 (0.6)             | 1.5 (0.8)   | 1.6 (0.5)   | .053                 |
| AX (KPa/L)                                                                                                                                  | 25.0 (17.3)           | 29.4 (16.3) | 21.9 (16.9) | .558                 |
| F res (L/sec)                                                                                                                               | 23.5 (5.9)            | 23.9 (5.5)  | 20.9 (5.7)  | .159                 |
| SD – standard deviation, T – ANOVA test for linear trend, R – resistance, X – reactance, AX – area of reactance, F res – Resonant frequency |                       |             |             |                      |
